# Supplementary material for: Discovery of novel acetylcholinesterase inhibitors through AI-powered structure prediction and high-performance computing-enhanced virtual screening
Source: Royal Society of Chemistry journal article supplement (doi:10.1039/d4ra07951e), 2025-01-01
Supplement: d4ra07951e1.pdf [file d4ra07951e1.pdf]

# Discovery of Novel Acetylcholinesterase Inhibitors through AI-Powered Structure Prediction and High-Performance Computing-Enhanced Virtual Screening (Supporting Information)

Beatriz Chafer-Dolz,<sup>\*,†</sup> José M. Cecilia,<sup>‡</sup> Baldomero Imbernón,<sup>¶</sup> Estrella  
Núñez-Delicado,<sup>¶</sup> Victor Casaña,<sup>†</sup> José M. Cecilia,<sup>§</sup> and José P.  
Cerón-Carrasco<sup>\*,§</sup>

<sup>†</sup>*Bio Logic Crop Science, S.L. Amadeo de Saboya 1-4, 46010, Valencia, Spain*

<sup>‡</sup>*Universitat Politècnica de Valencia (UPV). Camino de Vera S/N, 46022, Valencia, Spain.*

<sup>¶</sup>*Universidad Católica San Antonio de Murcia (UCAM). Campus de los Jerónimos, 30107,  
Murcia, Spain*

<sup>§</sup>*Centro Universitario de la Defensa, Academia General del Aire. Universidad Politécnica  
de Cartagena. C/ Coronel López Peña s/n 30729. Santiago de la Ribera, Murcia, Spain*

E-mail: bchafer@biologiccropscience.com; jose.ceron@tud.upct.es

Table S-1: Parameters for *METADOCK 2* adapted for AChE virtual screening

| Metaheuristic Parameters | Description                                                                                                                                                                                                                                                                                                                                                                                                                                                                                        |
|--------------------------|----------------------------------------------------------------------------------------------------------------------------------------------------------------------------------------------------------------------------------------------------------------------------------------------------------------------------------------------------------------------------------------------------------------------------------------------------------------------------------------------------|
| <b>ParamIni</b>          | <p><b>INEIni</b> Initial count of ligand conformations.</p> <p><b>IIEFlex</b> Enhancement of flexibility in the initial improvement functions.</p> <p><b>PEIIni</b> Proportion of top conformations refined during initialization.</p> <p><b>IIEIni</b> Enhancement of initial improvement functions.</p> <p><b>PBEIni</b> Fraction of top conformations retained for subsequent iterations.</p> <p><b>PWEIni</b> Fraction of lower-quality conformations carried to the next iteration phase.</p> |
| <b>ParamSel</b>          | <p><b>PBESel</b> Selects a percentage of the best conformations for combination.</p> <p><b>PWESel</b> Selects a percentage of the poorest conformations for combination.</p>                                                                                                                                                                                                                                                                                                                       |
| <b>ParamCom</b>          | <p><b>PBBCom</b> Percentage for combining the best-ranked conformations.</p> <p><b>PWWCom</b> Percentage for combining the worst-ranked conformations.</p> <p><b>PBWCom</b> Percentage for combining the best and worst conformations.</p>                                                                                                                                                                                                                                                         |
| <b>ParamMut</b>          | <p><b>PMUCom</b> Proportion of top combinations subjected to mutation.</p> <p><b>IMUCom</b> Degree of mutation applied to combined elements.</p>                                                                                                                                                                                                                                                                                                                                                   |
| <b>ParamImp</b>          | <p><b>PEIImp</b> Proportion of top combined conformations to be enhanced.</p>                                                                                                                                                                                                                                                                                                                                                                                                                      |
| <b>ParamInc</b>          | <p><b>IIEImp</b> Degree of enhancement applied to elements after combination.</p>                                                                                                                                                                                                                                                                                                                                                                                                                  |
| <b>ParamEnd</b>          | <p><b>PBEInc</b> Proportion of the best conformations included in the reference set.</p> <p><b>NIREnd</b> Limit on steps without improvement before termination.</p> <p><b>MNIEnd</b> Maximum number of iterations allowed, irrespective of improvement.</p>                                                                                                                                                                                                                                       |

**Table S-2: Configurations of METADOCK 2 utilized in the evaluation, labeled from M1 to M4**

|                | <i>Configurations</i> |     |     |      |
|----------------|-----------------------|-----|-----|------|
|                | M1                    | M2  | M3  | M4   |
| <b>INEIni</b>  | 128                   | 128 | 256 | 1024 |
| <b>IIEFlex</b> | 20                    | 30  | 40  | 50   |
| <b>PEIIni</b>  | 100                   | 100 | 50  | 50   |
| <b>IIEIni</b>  | 50                    | 150 | 200 | 200  |
| <b>PBEIni</b>  | 100                   | 50  | 50  | 100  |
| <b>PWEIni</b>  | 0                     | 50  | 50  | 0    |
| <b>PBESel</b>  | 50                    | 50  | 80  | 100  |
| <b>PWESel</b>  | 50                    | 50  | 20  | 0    |
| <b>PBBCom</b>  | 30                    | 20  | 100 | 15   |
| <b>PWWCom</b>  | 0                     | 20  | 10  | 0    |
| <b>PBWCom</b>  | 0                     | 20  | 10  | 0    |
| <b>PMUCom</b>  | 20                    | 0   | 10  | 0    |
| <b>IMUCom</b>  | 50                    | 0   | 30  | 0    |
| <b>PEIImp</b>  | 50                    | 50  | 100 | 100  |
| <b>IIEImp</b>  | 200                   | 100 | 100 | 50   |
| <b>PBEInc</b>  | 50                    | 90  | 50  | 90   |
| <b>NIREnd</b>  | 4                     | 4   | 4   | 5    |
| <b>MNIEnd</b>  | 4                     | 4   | 4   | 5    |

The seminal AChE within insecticide framework was originally published more than 20 years ago for the fruit fly *Drosophila melanogaster*. The work conducted by Sussman and coworkers resolved both for the three-dimensional structures of AChE and of its complexes with two potent inhibitors (*Protein Sci.* 2000, **9**, 1063). It was shown that the insect AChEs enzyme are rather similar to that of vertebrate but with a smaller active-site size. More recent X-ray structures are available now in the literature. An excellent example is the crystal deposited with PDB code 6XYS entitled “Update of native acetylcholinesterase from *Drosophila Melanogaster*” (*Molecules* 2020, **25**, 1198). Modelled AChE structure for cockroach has been compared that recent experimental AChE from *Drosophila melanogaster*. Their overall structures are very similar, with a RMSD value of 1.49 Å only. That agreement further confirms the conservation of the AChE in insects.

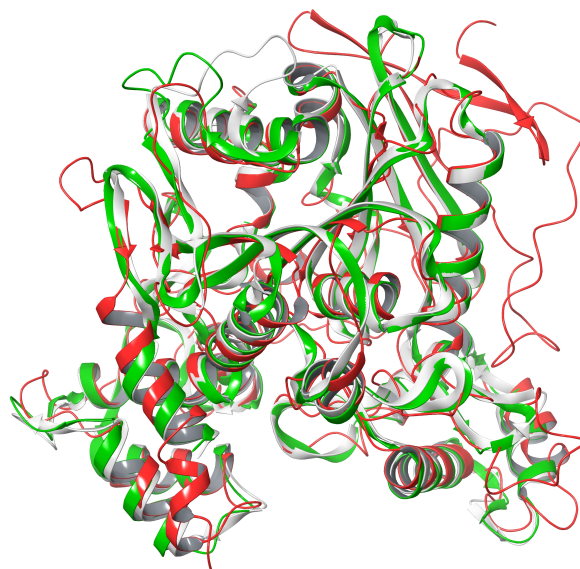

Figure S-1: Overlays for the generated AChE target models displayed as cartoons. Color scheme: Homology model in green, AlphaFold structure in white and experimental AChE of in red.

## Protein Structure Alignment Results: AlphaFold vs. Homology

```

.....+.....+.....+.....
AlpaFold  SSA 13139   1 CCCCCCEEEEECCCCCCCCCEEEEECECCCCCGCCCCC
Homology   SSA 2      1 CCCCCCEEEEECCCCCCCCCEEEEECECCCCCGCCCCC
AlpaFold           13139   1 PLSEDCLYINVVAPKPRPRNAAMVWIFGGGFYSGSATLD
Homology           2      1 PLSEDCLYINVVAPKPRPRNAAMVWIFGGGFYSGSATLD

.....+.....+.....+.....
AlpaFold  SSA 13139   41 CCCHHHHHHHHCCEEEEECCCCCCCCCCCCCCCCCHH
Homology   SSA 2      41 CCCHHHHHHHHCCEEEEECCCCCCCCCCCCCCCCCHH
AlpaFold           13139   41 VYDHKTLVSEENVIIIVSMQYRVASLGFLFFDTGDVPGNAG
Homology           2      41 VYDHKTLVSEENVIIIVSMQYRVASLGFLFFDTGDVPGNAG

.....+.....+.....+.....
AlpaFold  SSA 13139   81 HHHHHHHHHHHHCCEEEEECCCCCCCCCEEEEECHHHHHHHHH
Homology   SSA 2      81 HHHHHHHHHHHHCCEEEEECCCCCCCCCEEEEECHHHHHHHHH
AlpaFold           13139   81 LFDQLMALQWIHDNIQAFGGNPNNVTLFGESAGAVSVSLH
Homology           2      81 LFDQLMALQWIHDNIQAFGGNPNNVTLFGESAGAVSVSLH

.....+.....+.....+.....
AlpaFold  SSA 13139  121 HHHHCCCCCCEEEEECCCCCCCCCECHHHHHHHHHHH
Homology   SSA 2      121 HHHHCCCCCCEEEEECCCCCCCCCECHHHHHHHHHHH
AlpaFold           13139  121 LLSPLSRNLFSQAIMESGSPTAPWAIISREESILRGLRLA
Homology           2      121 LLSPLSRNLFSQAIMESGSPTAPWAIISREESILRGLRLA

.....+.....+.....+.....
AlpaFold  SSA 13139  161 HHHCCCCCCHHHHHHHHHHHCHHHHHHHCCC-CCCCC

```

|                            |     |       |     |                                              |
|----------------------------|-----|-------|-----|----------------------------------------------|
| Homology                   | SSA | 2     | 161 | HHHCCCCCCCCCHHHHHHHHHHHHHCHHHHHHHHCCCC-CCCC  |
| AlpaFold                   |     | 13139 | 161 | EAVGCPSSRSDIRAVIDCLRKKNATDLVNNEWG-TLGICE     |
| Homology                   |     | 2     | 161 | EAVGCPSSRSDIRAVIDCLRKKNATDLVNNEWGTL-GICE     |
| .....+......+......+...... |     |       |     |                                              |
| AlpaFold                   | SSA | 13139 | 200 | CCCCCCCCCCCCCCHHHHHHHCCCCCEEEEEEECCCCHH      |
| Homology                   | SSA | 2     | 200 | CCCCCCCCCCCCCCHHHHHHHCCCCCEEEEEEECCCCHH      |
| AlpaFold                   |     | 13139 | 200 | FPFVPIIDGAILDGPQRSLAEKNFKKTNILMGSNTEEGY      |
| Homology                   |     | 2     | 200 | FPFVPIIDGAILDGPQRSLAEKNFKKTNILMGSNTEEGY      |
| .....+......+......+...... |     |       |     |                                              |
| AlpaFold                   | SSA | 13139 | 240 | HHHHHHHCCCCCCCCCCHHHHHHHHHHHHHCCCCCHHHH      |
| Homology                   | SSA | 2     | 240 | HHHHHHHCCCCCCCCCCHHHHHHHHHHHHHCCCCCHHHH      |
| AlpaFold                   |     | 13139 | 240 | YFIIYYLTELFRKEENVYVNREEFLRSVRELNPYVNNVAR     |
| Homology                   |     | 2     | 240 | YFIIYYLTELFRKEENVYVNREEFLRSVRELNPYVNNVAR     |
| .....+......+......+...... |     |       |     |                                              |
| AlpaFold                   | SSA | 13139 | 280 | HHHHHHHCCCCCCCCCCHHHHHHHHHHHHHHHHHHHHHHHHHHH |
| Homology                   | SSA | 2     | 280 | HHHHHHHCCCCCCCCCCHHHHHHHHHHHHHHHHHHHHHHHHHHH |
| AlpaFold                   |     | 13139 | 280 | QAIVFEYTDWLNPDPIRNRDALDKMVG DYQFTCNVNEFA     |
| Homology                   |     | 2     | 280 | QAIVFEYTDWLNPDPIRNRDALDKMVG DYQFTCNVNEFA     |
| .....+......+......+...... |     |       |     |                                              |
| AlpaFold                   | SSA | 13139 | 320 | HHHHHHCCEEEEEEECCCCCCCCCCCCCCCCCCHHHHHHH     |
| Homology                   | SSA | 2     | 320 | HHHHHHCCEEEEEEECCCCCCCCCCCCCCCCCCHHHHHHH     |
| AlpaFold                   |     | 13139 | 320 | HRYAETGNNVYMYFKHRSAGNPWPSWTGVMHGDEIN YVF     |
| Homology                   |     | 2     | 320 | HRYAETGNNVYMYFKHRSAGNPWPSWTGVMHGDEIN YVF     |

.....+......+......+

AlpaFold SSA 13139 360 CCCCCCCCCCHHHHHHHHHHHHHHHHHHHHHHCCCEEECCC  
 Homology SSA 2 360 CCCCCCCCCCHHHHHHHHHHHHHHHHHHHHHHCCCCC--C  
 AlpaFold 13139 360 GEPLNPAKNYQPHEIELSKRMMRYWANFAKTGNPSMEDG  
 Homology 2 360 GEPLNPAKNYQPHEIELSKRMMRYWANFAKTGNPSMS--E

.....+......+......+

AlpaFold SSA 13139 400 ECCC--CCCCCECCCCCEEEEECECEEECCCHHHHHH  
 Homology SSA 2 398 CCCCCCCCCCCCCCCCCCEEEEECCCCCCCCCCHHHHHH  
 AlpaFold 13139 400 TWTA--TYWPVHTAYGREYLTLDVNSTETGRGPRLKQCAF  
 Homology 2 398 DGTWTATYWPVHTAYGREYLTLDVNSTETGRGPRLKQCAF

.....+......+......+

AlpaFold SSA 13139 438 HHH  
 Homology SSA 2 438 HHH  
 AlpaFold 13139 438 WKN  
 Homology 2 438 WKN

RMSD: 0.89 Angstrom

Protein Structure Alignment Results: AlphaFold vs. PDB=6XYS

.....+.....+.....+.....

|          |     |       |                                           |
|----------|-----|-------|-------------------------------------------|
| AlpaFold | SSA | 13139 | -----                                     |
| 6XYS     | SSA | 45372 | 3 CCEECCCCCEEECEEEEECEEEEEEEEEEECCCECCCC  |
| AlpaFold |     | 13139 | -----                                     |
| 6XYS     |     | 45372 | 3 DRLVVQTSSGPVGRSVTVQGREVHVYTGIPYAKPPVEDL |

.....+.....+.....+.....

|          |     |       |                                             |
|----------|-----|-------|---------------------------------------------|
| AlpaFold | SSA | 13139 | -----                                       |
| 6XYS     | SSA | 45372 | 43 CCCCCCCCCCCCCCECCCCCECCCCCCCCCCHHHHH     |
| AlpaFold |     | 13139 | -----                                       |
| 6XYS     |     | 45372 | 43 RFRKPVPAEPWHGVLDATGLSATCVQERYEYFPGFSGEEI |

.....+.....+.....+.....

|          |     |       |                                             |
|----------|-----|-------|---------------------------------------------|
| AlpaFold | SSA | 13139 | 1 -----CCCCCCEEEEECCCCCCEEEEEEECCCCCCC      |
| 6XYS     | SSA | 45372 | 83 HHHCCCCCCCCCEEEEEEECC---CCEEEEEEECCCCCCC |
| AlpaFold |     | 13139 | 1 -----PLSEDCLYINVVAPKPRPRNAAVMVWIFGGGFYSG  |
| 6XYS     |     | 45372 | 83 WNPNTNVSEDCLYINWAPA---NGLPILIWYGGGFMTG   |

.....+.....+.....+.....

|          |     |       |                                               |
|----------|-----|-------|-----------------------------------------------|
| AlpaFold | SSA | 13139 | 36 CCCCCCCHHHHHHHHCCEEEEEEECCCCCCCCC-C---     |
| 6XYS     | SSA | 45372 | 156 CCCCCCCHHHHHHHHCCEEEEEEECCCCCCCCCCCCCCC   |
| AlpaFold |     | 13139 | 36 SATLDVYDHKTLVSEENVIIIVSMQYRVASLGFLLFF-D--- |
| 6XYS     |     | 45372 | 156 SATLDIYNADIMAAVGNVIVASFQYRVGAFGLHLAPEMP   |

.....+.....+.....+.....

|          |     |       |                                            |
|----------|-----|-------|--------------------------------------------|
| AlpaFold | SSA | 13139 | 72 --C-CCCCCCHHHHHHHHHHHHHHHCCCCCCCCCEEEEE |
|----------|-----|-------|--------------------------------------------|



|                            |     |       |     |                                           |
|----------------------------|-----|-------|-----|-------------------------------------------|
| 6XYS                       | SSA | 45372 | 196 | CCCCCCCCCHHHHHHHHHHHHHHHHHCCCCCCCCCEEEEE  |
| AlpaFold                   |     | 13139 | 72  | --T-GDVPGNAGLFDQLMALQWIHDNIQAFGGNPNNVTLF  |
| 6XYS                       |     | 45372 | 196 | SEFAEEAPGNVGLWDQALAIRWLKDNAHAFGGNPEWMTLF  |
| .....+......+......+...... |     |       |     |                                           |
| AlpaFold                   | SSA | 13139 | 109 | ECCHHHHHHHHHHHHHCCCCCCCCCEEEEECCCCCCCCCEC |
| 6XYS                       | SSA | 45372 | 236 | ECCHHHHHHHHHHHHHCCCCCCCCCEEEEECCCCCCCCCEC |
| AlpaFold                   |     | 13139 | 109 | GESAGAVSVSLHLLSPLSRNLFSQAIMESGSPTAPWAIIS  |
| 6XYS                       |     | 45372 | 236 | GESAGSSSVNAQLMSPVTRGLVKRGMMQSGTMNAPWSHMT  |
| .....+......+......+...... |     |       |     |                                           |
| AlpaFold                   | SSA | 13139 | 149 | HHHHHHHHHHHHHHCCCCCCH--H-HHHHHHHHHCH      |
| 6XYS                       | SSA | 45372 | 276 | HHHHHHHHHHHHCCCCCCH--CCCCCCHHHHHHHCH      |
| AlpaFold                   |     | 13139 | 149 | REESILRGLRLAEAVGCPSSRSI---R-AVIDCLRKNA    |
| 6XYS                       |     | 45372 | 276 | SEKAVEIGKALINDCNCNAS--MLKTNPAHVMSCMRSVDA  |
| .....+......+......+...... |     |       |     |                                           |
| AlpaFold                   | SSA | 13139 | 185 | HHHHHHCC-CCCCCCCCCCCCCCCCCCCCCHHHHHHHCC   |
| 6XYS                       | SSA | 45372 | 314 | HHHHHHCCCCCCCCCCCCCCCCCCCCCCCCCHHHHHHH-H  |
| AlpaFold                   |     | 13139 | 185 | TDLVNNEW-GTLGICEFPFVPIIDGAILDGPPQRSIAEKN  |
| 6XYS                       |     | 45372 | 314 | KTISVQQWNSYSGILSFPSAPTIDGAFLPADPMTLMKT-A  |
| .....+......+......+...... |     |       |     |                                           |
| AlpaFold                   | SSA | 13139 | 224 | -CCC-EEEEEECCCHHHHHHHHHCCCCCCCCCCHHH      |
| 6XYS                       | SSA | 45372 | 353 | CC-CCEEEEEEECCCHHHHHHHHHCCCCCCCCCCHHH     |
| AlpaFold                   |     | 13139 | 224 | -FKK-TNILMGSNTEEGYYFIIYYLTELFRKEENVYVNRE  |
| 6XYS                       |     | 45372 | 353 | DL-KDYDILMGNVRDEGTYFLLYDFIDYFDKDDATALPRD  |

.....+.....+.....+.....

|          |     |       |     |                                          |
|----------|-----|-------|-----|------------------------------------------|
| AlpaFold | SSA | 13139 | 262 | HHHHHHHHHCCCCCHHHHHHHHHHHHCCC-CCCCHHHHHH |
| 6XYS     | SSA | 45372 | 392 | HHHHHHHHHCCCCCHHHHHHHHHHHHCCCCC-C-HHHHHH |
| AlpaFold |     | 13139 | 262 | EFLRSVRELNPYVNNVARQAIVFEYTDWL-NPDDPIRNRD |
| 6XYS     |     | 45372 | 392 | KYLEIMNIFGKATQAEREAIIIFQYTSWEGN-P-GYQNQQ |

.....+.....+.....+.....

|          |     |       |     |                                            |
|----------|-----|-------|-----|--------------------------------------------|
| AlpaFold | SSA | 13139 | 301 | HHHHHHHHHCHHHHHHHHHHHHHHCCEEEEEEECCCCC     |
| 6XYS     | SSA | 45372 | 430 | HHHHHHHHHCHHHHHHHHHHHHHHCCEEEEEEECCCCC     |
| AlpaFold |     | 13139 | 301 | ALDKMVG DYQFTCNVNEFAHRYAETGNNVYMYF KHR SAG |
| 6XYS     |     | 45372 | 430 | QIGRAVGDHFFTCPTNEYA QAL AERGASVHYYYFTHRST  |

.....+.....+.....+.....

|          |     |       |     |                                            |
|----------|-----|-------|-----|--------------------------------------------|
| AlpaFold | SSA | 13139 | 341 | CCCCCCCCCCHHHHHHHCCCCCCCCCCHHHHHHHHHH      |
| 6XYS     | SSA | 45372 | 470 | CCCCCCCCCCHHHHHHHCCCCCCCCCCHHHHHHHHHH      |
| AlpaFold |     | 13139 | 341 | NPWPSWTGVMHGDEIN YVFG EPLNPAKNYQPHEIELSKRM |
| 6XYS     |     | 45372 | 470 | SLWGEWMGVLHGDEIEYFFGQPLNNSLQYRPVERELGKRM   |

.....+.....+.....+.....

|          |     |       |     |                                          |
|----------|-----|-------|-----|------------------------------------------|
| AlpaFold | SSA | 13139 | 381 | HHHHHHHHHCCCCEEECCCECCCCCCECCCCEEEEE     |
| 6XYS     | SSA | 45372 | 510 | HHHHHHHHHCCCCC-C---C--CCCCCCECCECEEEEC   |
| AlpaFold |     | 13139 | 381 | MRYWANFAKTGNPMSSEDGTWTATYWPVHTAYGREYLTLD |
| 6XYS     |     | 45372 | 510 | LSAVIEFAKTGNPA-Q---D--GEEWPNFSKEDPVYYIFS |

.....+.....+.....+.....

|          |     |       |     |                             |
|----------|-----|-------|-----|-----------------------------|
| AlpaFold | SSA | 13139 | 421 | CC---ECEECC-CCHHHHHHHH----- |
|----------|-----|-------|-----|-----------------------------|

6XYS        SSA 45372 544 CCCCCCE-EEHHHH-HHHHHHHHHHHHHHHHC  
AlpaFold        13139 421 VN---STETGRG-PRLKQCAFWKN-----  
6XYS        45372 544 TDDKIEK-LARGPL-AARCSFWNDYLPKVRWS

Alignment RMSD: 1.49 Angstrom
